# Supplementary material for: Land use affects the response of soil moisture and soil temperature to environmental factors in the loess hilly region of China
Source: PeerJ journal article supplement (doi:10.7717/peerj.13736), 2022-07-14
Supplement: raw_data.zip [file raw_data.zip]

## Sheet: Growing season in 2014
Date	Daily mean soil temperature (℃)
	10 cm				20 cm				40 cm				60 cm				100 cm
	Soybean sloping field	Maize terraced field	Jujube orchard	Grassland	Soybean sloping field	Maize terraced field	Jujube orchard	Grassland	Soybean sloping field	Maize terraced field	Jujube orchard	Grassland	Soybean sloping field	Maize terraced field	Jujube orchard	Grassland	Soybean sloping field	Maize terraced field	Jujube orchard	Grassland
2014-05-01		15.6595	15.8934	15.1582		15.0278	17.1045	15.3821		13.0913	16.6669	13.3389		12.0544	15.0893	11.5968		11.0125	13.5717	10.5265
2014-05-02		13.5872	14.177	12.7033		13.7036	14.2065	12.7899		13.2426	14.8034	12.9812		12.2644	14.8715	11.8835		11.0688	13.7615	10.675
2014-05-03		13.8057	15.3569	13.5479		13.5743	15.0783	13.3049		12.9827	14.757	12.6317		12.3172	14.4278	11.8717		11.1507	13.7559	10.8114
2014-05-04		13.5467	14.5913	13.0235		13.4324	14.6651	13.0086		12.8772	14.6505	12.5607		12.2981	14.3606	11.8218		11.219	13.7015	10.8833
2014-05-05		13.4197	15.9258	13.6652		13.2012	15.0528	13.1516		12.7499	14.5366	12.4114		12.2698	14.223	11.7837		11.2659	13.6503	10.9292
2014-05-06		14.9577	18.137	15.8605		14.0017	16.8721	14.8898		12.7054	15.4636	12.6433		12.2186	14.3826	11.7531		11.2995	13.6063	10.9533
2014-05-07		16.7404	20.6719	18.043		15.2253	18.5157	16.6704		13.0164	16.4524	13.245		12.262	14.8669	11.8856		11.3268	13.661	10.9862
2014-05-08		17.6979	20.8015	18.7894		16.224	19.4904	17.6419		13.5599	17.6187	14.041		12.4462	15.5732	12.1863		11.3678	13.8441	11.0724
2014-05-09		17.7028	17.9743	17.6765		16.7351	18.7303	17.5528		14.1397	17.9515	14.6919		12.7516	16.1489	12.5762		11.4557	14.1547	11.2256
2014-05-10		14.266	11.5131	12.0787		14.9763	13.9544	13.3129		14.4171	15.9172	14.4361		13.076	15.9684	12.9313		11.5833	14.453	11.4288
2014-05-11		13.124	12.7157	12.5248		13.5682	12.8666	12.3751		13.9389	13.9182	13.3119		13.1896	14.8628	12.9002		11.7245	14.4624	11.6103
2014-05-12		13.9791	15.4528	14.7492		13.6682	14.1744	13.8389		13.4437	13.8843	12.9554		13.0568	14.2146	12.6313		11.8282	14.2134	11.6859
2014-05-13		15.7962	18.1812	17.0164		14.7513	16.6176	15.9472		13.4051	15.2104	13.3928		12.9309	14.3623	12.5152		11.8814	13.9904	11.6782
2014-05-14		15.9702	16.5916	15.971		15.2852	16.6074	15.7319		13.7482	16.0134	13.9806		12.9692	14.9272	12.6543		11.9163	13.9899	11.694
2014-05-15		15.9317	17.7412	16.5908		15.2276	16.7003	15.7286		13.9614	15.8653	14.0296		13.1062	15.0927	12.8477		11.9543	14.1097	11.7718
2014-05-16		17.3043	19.6256	18.3471		16.0757	18.2101	17.2463		14.1265	16.6813	14.3737		13.2191	15.3558	12.9786		12.0163	14.2158	11.8703
2014-05-17		18.2982	19.8484	19.0847		16.9636	18.98	18.1236		14.5317	17.5441	14.9726		13.3877	15.878	13.213		12.0908	14.3757	11.9791
2014-05-18		18.8172	20.5173	19.6993		17.5029	19.2843	18.6415		15.0029	17.8479	15.4434		13.6377	16.285	13.5339		12.186	14.6098	12.123
2014-05-19		19.9046	22.2527	21.3398		18.2942	20.5598	19.9434		15.4275	18.5883	15.9863		13.9196	16.679	13.8602		12.309	14.8396	12.3051
2014-05-20		20.4945	22.5622	21.7774		18.956	21.1218	20.5829		15.9385	19.275	16.6467		14.2303	17.2163	14.2396		12.4583	15.1073	12.5133
2014-05-21		21.2121	23.3449	22.5493		19.5857	21.893	21.3044		16.4235	19.909	17.2129		14.5781	17.7088	14.6476		12.6314	15.4171	12.746
2014-05-22		21.5756	23.0361	22.6932		20.0871	22.0609	21.656		16.9076	20.3699	17.7446		14.9372	18.1852	15.056		12.8251	15.7449	13.0006
2014-05-23		20.8043	20.0717	20.5757		20.0393	20.8488	20.6908		17.3271	20.3114	18.1149		15.2987	18.5064	15.4514		13.0356	16.0769	13.2738
2014-05-24		19.1902	19.206	18.926		18.8503	18.9735	18.6836		17.4004	18.8711	17.6728		15.6019	18.1918	15.7188		13.2518	16.3216	13.5463
2014-05-25		18.9158	19.0833	18.8666		18.4933	18.7875	18.5023		17.182	18.4862	17.3104		15.7238	17.8214	15.7239		13.4595	16.3775	13.761
2014-05-26		18.9752	20.1821	19.7331		18.3464	19.2761	18.8878		17.0124	18.4458	17.124		15.7468	17.6403	15.6733		13.6251	16.3607	13.8946
2014-05-27		20.2875	22.5258	21.7575		19.0864	21.0712	20.6412		16.9951	19.33	17.4093		15.7485	17.7997	15.6681		13.7532	16.351	13.9809
2014-05-28		21.0196	22.5341	21.4572		19.7171	21.5204	20.3097		17.2567	20.0751	17.6823		15.8321	18.2773	15.822		13.8596	16.4451	13.3299
2014-05-29	23.7852	22.3703	24.8221	23.2674	22.5715	20.6553	22.9588	21.7921	18.3962	17.6186	20.8424	17.7578	16.4783	16.0084	18.7277	15.4996	14.3354	13.9686	16.637	13.218
2014-05-30	24.4479	23.3705	25.4082	23.8576	23.4428	21.5854	23.9404	22.5709	18.7642	18.1564	21.8408	18.2722	16.4071	16.266	19.3714	15.5907	14.3141	14.0991	16.8994	13.2813
2014-05-31	22.6564	22.9615	23.3725	21.9135	22.6167	21.8167	23.2583	21.6997	19.2079	18.7124	22.1051	18.6876	16.5997	16.613	19.9078	15.8485	14.3974	14.2595	17.2481	13.417
2014-06-01	22.5386	22.0231	23.2562	21.8249	21.7265	21.1038	22.0878	20.8337	19.168	18.9393	21.1811	18.4505	16.8392	16.952	19.8567	16.082	14.5377	14.4469	17.5551	13.5935
2014-06-02	23.9459	22.9803	24.7202	23.2284	23.0637	21.6465	23.478	22.1061	19.2134	18.9814	21.8283	18.5722	16.9687	17.1455	19.9145	16.1745	14.6949	14.6415	17.7156	13.7704
2014-06-03	24.0339	23.3547	24.7633	23.6034	23.2619	22.0287	23.6728	22.5023	19.5177	19.2335	22.1866	18.9128	17.131	17.329	20.248	16.3451	14.844	14.8153	17.8953	13.9277
2014-06-04	23.7224	23.2714	24.0907	22.9213	23.2002	22.1964	23.5395	22.3611	19.7758	19.5068	22.3744	19.2228	17.3341	17.5463	20.5066	16.5646	14.994	14.9862	18.1081	14.0923
2014-06-05	23.9652	22.9688	24.2211	23.0359	23.0734	21.9313	23.1193	22.045	19.8579	19.654	22.0119	19.2136	17.5359	17.7599	20.5251	16.7727	15.1516	15.1592	18.3013	14.2635
2014-06-06	23.323	22.7244	23.5156	21.7578	23.0473	21.9792	23.2491	21.6373	20.0269	19.7495	22.3177	19.3531	17.6928	17.9213	20.6598	16.9104	15.313	15.3348	18.4509	14.4311
2014-06-07	22.6458	21.8823	22.8403	21.6629	22.1675	21.2774	22.3665	20.9871	19.9577	19.7195	21.7161	19.1017	17.8424	18.054	20.5876	17.0263	15.4663	15.4936	18.5824	14.5882
2014-06-08	24.3281	23.0118	24.6613	23.3359	23.3796	21.8017	23.4167	22.2091	19.9355	19.6084	22.0312	19.1303	17.9088	18.0918	20.5489	17.047	15.6057	15.6268	18.6513	14.7252
2014-06-09	24.3473	23.2426	24.8298	23.2871	23.6201	22.1658	23.8644	22.4337	20.1969	19.7746	22.5003	19.4298	18.0107	18.1529	20.8037	17.1426	15.7311	15.7464	18.7401	14.842
2014-06-10	24.4384	23.268	24.9406	23.2655	23.7697	22.2579	24.1056	22.4373	20.4125	19.9479	22.7786	19.6071	18.1609	18.273	21.0368	17.2935	15.8525	15.8559	18.8792	14.9587
2014-06-11	25.2247	23.8157	25.778	24.1387	24.2835	22.577	24.5338	23.0057	20.6022	20.0931	23.0032	19.766	18.3269	18.4005	21.2299	17.4374	15.981	15.9698	19.0139	15.086
2014-06-12	25.3984	24.3151	25.9542	24.5501	24.6867	23.0345	25.0522	23.5089	20.8959	20.3258	23.5281	20.0835	18.5006	18.5438	21.5261	17.5973	16.119	16.0914	19.1856	15.2158
2014-06-13	23.9038	23.9626	24.3253	23.1934	23.9269	23.0932	24.4109	22.934	21.1455	20.6054	23.5682	20.3509	18.7036	18.7377	21.7802	17.7985	16.2619	16.2257	19.3757	15.3519
2014-06-14	22.5805	22.863	22.8134	22.1158	22.5427	22.3805	22.8239	21.7884	21.0261	20.675	22.6063	20.1466	18.873	18.9195	21.5986	17.962	16.4099	16.3614	19.5375	15.5003
2014-06-15	23.8394	23.0279	24.0807	23.2625	22.9851	22.1852	22.9644	22.1933	20.7549	20.518	22.146	19.8915	18.92	18.9885	21.2319	17.9873	16.5521	16.495	19.5529	15.6369
2014-06-16	24.0431	23.7339	24.3046	23.5909	23.7429	22.7359	23.9375	22.9537	20.8334	20.5203	22.8142	20.0985	18.9187	19.0068	21.2991	17.9961	16.6641	16.6099	19.5312	15.7386
2014-06-17	23.9198	23.2582	23.8999	23.3684	23.0909	22.4136	22.9787	22.3727	20.8806	20.6292	22.3163	20.1287	18.9835	19.081	21.312	18.0946	16.7554	16.6997	19.5764	15.8326
2014-06-18	24.9274	24.0246	24.9563	23.7375	24.3484	22.9802	24.2798	23.1245	21.001	20.6839	23.0161	20.3306	19.0356	19.1493	21.3921	18.1621	16.8439	16.7926	19.6015	15.9276
2014-06-19	21.6916	22.59	21.9299	20.9837	22.3462	22.3868	22.6656	21.3809	21.1703	20.835	22.6337	20.3473	19.1474	19.2532	21.5445	18.2868	16.9321	16.8861	19.6986	16.0246
2014-06-20	21.7382	21.4506	22.1252	21.1382	21.3401	21.3129	21.6145	20.6648	20.7159	20.6045	21.4575	19.7748	19.2063	19.3075	21.0835	18.2996	17.0218	16.9748	19.7318	16.1258
2014-06-21	23.5052	22.5079	23.1621	23.0872	22.7435	21.6625	22.5372	22.147	20.478	20.3169	21.7445	19.7341	19.1123	19.2237	20.8581	18.1843	17.1055	17.0497	19.6372	16.1929
2014-06-22	25.3868	23.6819	24.525	24.7086	24.2024	22.4057	23.4327	23.4955	20.6742	20.3813	22.1798	20.1243	19.0706	19.1768	20.9593	18.1974	17.153	17.0954	19.5768	16.2315
2014-06-23	25.7286	24.4865	24.7805	25.2764	24.9814	23.1739	24.2309	24.2887	21.1398	20.6749	22.9549	20.7027	19.1458	19.2398	21.3052	18.3622	17.197	17.1359	19.6218	16.283
2014-06-24	25.8919	24.8484	25.0963	25.6288	25.1566	23.5726	24.4425	24.654	21.538	21.02	23.2281	21.1271	19.3332	19.3971	21.6039	18.615	17.2529	17.1923	19.7447	16.3738
2014-06-25	24.3769	24.2388	23.8751	23.9851	24.2404	23.4797	23.8573	23.7732	21.7798	21.2957	23.2278	21.3846	19.5385	19.5923	21.8034	18.8679	17.3502	17.2814	19.8877	16.5011
2014-06-26	25.6863	24.4133	24.9749	25.2252	24.6502	23.319	23.9636	24.0961	21.699	21.341	22.8826	21.2311	19.6907	19.7531	21.6974	19.0368	17.4572	17.3795	19.9981	16.647
2014-06-27	25.7484	25.2131	24.6301	25.2899	25.3241	23.9803	24.5743	24.6541	21.9364	21.4598	23.5293	21.5446	19.7847	19.8485	21.8821	19.1406	17.5677	17.4877	20.0606	16.7779
2014-06-28	23.2777	24.2489	22.5309	22.8512	23.7401	23.7189	23.1753	23.1138	22.1249	21.694	23.1069	21.6261	19.9356	19.9963	21.9851	19.309	17.6743	17.5899	20.6441	16.9016
2014-06-29	22.707	22.8598	22.6415	22.2396	22.5115	22.6763	22.1188	21.9699	21.7693	21.6072	22.0503	21.0897	20.0319	20.1161	21.6056	19.3694	17.7802	17.695	20.6875	17.0279
2014-06-30	21.9879	22.6883	22.1841	22.2586	22.2223	22.3723	22.303	22.0368	21.4295	21.323	22.0501	20.7953	19.9849	20.1015	21.3403	19.2693	17.8823	17.7955	20.6108	17.1223
2014-07-01	21.0933	22.035	21.3062	21.6206	21.3488	21.9291	21.4705	21.5568	21.1334	21.1182	21.5827	20.6341	19.8947	20.0294	21.1437	19.1818	17.9435	17.8629	20.5303	17.1738
2014-07-02	21.7256	21.827	21.904	22.2657	21.3753	21.549	21.3305	21.6819	20.7753	20.8588	21.1514	20.389	19.7768	19.9298	20.8261	19.0961	17.979	17.9025	20.4094	17.2036
2014-07-03	23.9319	22.7475	23.9196	23.8093	22.9331	21.9385	22.5453	22.8242	20.6949	20.6973	21.5859	20.492	19.638	19.8116	20.7576	19.0167	17.9892	17.9208	20.2665	17.2154
2014-07-04	25.5567	23.9737	25.6168	25.3888	24.6244	22.7468	24.2117	24.2883	21.0709	20.8232	22.6436	20.9594	19.6018	19.768	21.0967	19.0585	17.9839	17.9267	20.2173	17.2255
2014-07-05	25.6445	24.2902	26.0747	25.6887	24.8415	23.1924	24.73	24.7025	21.5574	21.1391	23.2983	21.4776	19.7182	19.8466	21.5981	19.247	17.9906	17.9338	20.3284	17.264
2014-07-06	26.8639	25.0601	27.4124	26.8305	25.8043	23.7328	25.7714	25.6353	21.9255	21.4218	23.9995	21.9158	19.9015	19.9969	22.0223	19.4868	18.031	17.9704	20.5264	17.343
2014-07-07	26.9288	25.7711	27.5244	26.9588	26.3108	24.4075	26.4738	26.0978	22.4013	21.7793	24.7931	22.4324	20.1186	20.1793	22.5662	19.7599	18.1059	18.0372	20.7824	17.4584
2014-07-08	24.0578	25.087	24.4873	24.2329	24.6403	24.3932	25.1958	24.599	22.721	22.143	24.7165	22.6818	20.3847	20.414	22.9394	20.0513	18.2107	18.1307	21.0755	17.6028
2014-07-09	19.0874	21.6002	19.2464	18.9237	20.3161	22.3775	20.9401	20.0938	22.2969	22.14	22.5092	21.9148	20.5662	20.6153	22.5382	20.1989	18.3384	18.2483	21.268	17.7598
2014-07-10	21.5801	21.1336	21.895	21.3959	20.8863	21.2304	20.7336	20.6102	21.1945	21.4769	20.8511	20.6101	20.4561	20.5918	21.3519	19.9749	18.4562	18.3571	21.1063	17.8799
2014-07-11	22.4354	22.2854	22.7943	22.466	22.2196	21.8042	22.3403	21.9945	20.9767	21.0523	21.745	20.5915	20.1957	20.3849	21.1419	19.6546	18.5112	18.4252	20.799	17.909
2014-07-12	22.7866	22.5059	23.0652	22.653	22.3554	22.0286	22.4488	22.1767	21.0759	21.05	21.9354	20.7588	20.0876	20.2659	21.2835	19.567	18.5133	18.4487	20.6737	17.8947
2014-07-13	23.7832	22.9475	23.7568	23.6232	23.0096	22.2324	22.8767	22.7723	21.1536	21.0934	22.18	20.8868	20.0573	20.2316	21.3781	19.5693	18.5174	18.4651	20.6391	17.8933
2014-07-14	24.942	23.9092	24.3221	24.6271	24.145	22.8694	23.4013	23.7692	21.3975	21.2328	22.5578	21.225	20.0807	20.249	21.5471	19.622	18.5318	18.4869	20.6435	17.9126
2014-07-15	25.856	24.5467	25.7728	25.5776	24.8252	23.4148	24.1031	24.4985	21.7518	21.5067	22.8571	21.5964	20.1847	20.3436	21.7265	19.7651	18.5531	18.5181	20.7158	17.9514
2014-07-16	27.1006	25.5601	27.3926	26.6094	26.0392	24.1773	25.6221	25.5308	22.1729	21.8296	23.7924	22.0749	20.3503	20.4951	22.0894	19.9563	18.6075	18.5688	20.8398	18.0193
2014-07-17	27.8966	26.3455	28.6194	27.2912	26.7622	24.868	26.664	26.1367	22.6747	22.2392	24.6205	22.5512	20.5745	20.7018	22.6147	20.2073	18.6834	18.6431	21.0464	18.1148
2014-07-18	27.7872	27.0903	29.413	27.7732	27.0383	25.5485	27.6793	26.7095	23.1726	22.6771	25.5196	23.0069	20.8415	20.9579	23.2042	20.4807	18.7884	18.7432	21.305	18.2376
2014-07-19	27.543	27.3036	29.3475	27.6297	26.917	25.934	27.9758	26.7343	23.5238	23.1106	26.0789	23.3661	21.131	21.2475	23.7586	20.7618	18.9152	18.8752	21.6012	18.3834
2014-07-20	27.2012	27.429	28.9268	27.7175	26.7685	26.141	27.9399	26.8326	23.7466	23.4379	26.31	23.5773	21.3952	21.5352	24.1347	21.0134	19.0726	19.0273	21.8829	18.5458
2014-07-21	26.7426	27.2998	28.0026	26.8804	26.5551	26.2319	27.5696	26.4464	23.8988	23.6971	26.3624	23.7468	21.6127	21.7866	24.376	21.2206	19.2326	19.1899	22.1205	18.7108
2014-07-22	23.1505	25.5422	23.7777	23.1628	24.1741	25.4176	25.0747	23.9377	23.8784	23.839	25.4187	23.54	21.7886	22.0074	24.3222	21.3734	19.3861	19.3614	22.3054	18.8694
2014-07-23	20.1048	23.0817	20.4327	20.0526	21.4662	23.7604	22.2221	21.193	23.2578	23.5529	23.5833	22.6358	21.8347	22.1104	23.6199	21.3345	19.5328	19.5232	22.3293	19.0042
2014-07-24	22.2629	22.739	23.5143	22.3757	21.7432	22.8043	22.2385	21.6587	22.3548	22.8958	22.2678	21.6021	21.655	21.9955	22.6229	21.0383	19.6383	19.641	22.0968	19.0753
2014-07-25	24.9559	24.3034	26.6382	24.8325	24.1039	23.501	24.9019	23.7936	22.156	22.4939	23.4413	21.6542	21.3739	21.7512	22.4622	20.7059	19.6746	19.6983	21.7758	19.0621
2014-07-26	26.2544	25.5709	28.2176	26.2237	25.4839	24.3788	26.5743	25.153	22.5358	22.5762	24.6932	22.1705	21.2623	21.6217	22.9342	20.637	19.6621	19.7082	21.6772	19.0139
2014-07-27	26.6195	26.362	28.7472	26.6914	26.0021	25.0809	27.3528	25.7415	23.0007	22.8702	25.5117	22.6693	21.3452	21.6521	23.504	20.7584	19.6546	19.7085	21.7943	18.9966
2014-07-28	27.1115	26.8627	29.1772	27.1017	26.469	25.5739	27.8608	26.1397	23.3827	23.1964	26.0596	23.0387	21.5136	21.778	23.9576	20.9466	19.6818	19.7348	21.9997	19.0251
2014-07-29	25.6593	26.1947	27.0369	25.2175	25.8201	25.5492	27.0656	25.2313	23.7123	23.4957	26.2194	23.3146	21.7111	21.9507	24.3426	21.1474	19.7522	19.7865	22.2357	19.0939
2014-07-30	25.9053	25.5838	27.8394	25.981	25.4166	24.952	26.4922	25.1418	23.6339	23.5289	25.4189	23.0522	21.8789	22.1039	24.185	21.2819	19.8351	19.8634	22.434	19.1884
2014-07-31	26.5056	26.0198	28.7554	26.7263	26.111	25.1195	27.3876	25.8911	23.6919	23.4768	25.8918	23.2201	21.9436	22.1584	24.2202	21.3169	19.9308	19.9467	22.5232	19.273
2014-08-01	27.2113	26.506	29.1628	27.1445	26.7341	25.4638	27.9592	26.3505	23.9339	23.5629	26.3698	23.513	22.0417	22.2108	24.4603	21.4218	20.0106	20.0195	22.6434	19.3438
2014-08-02	27.896	27.1283	29.8161	27.8697	27.3298	25.9031	28.4348	26.9014	24.2263	23.7266	26.7259	23.7765	22.186	22.2964	24.7309	21.5725	20.0978	20.0846	22.8048	19.4263
2014-08-03	28.186	27.713	30.1299	28.1996	27.7113	26.3898	28.8889	27.2769	24.547	23.9616	27.1683	24.0751	22.3655	22.415	25.039	21.7449	20.1952	20.1512	22.9953	19.5234
2014-08-04	26.2219	27.0928	27.4227	25.8405	26.7401	26.3906	27.873	26.0756	24.8308	24.2311	27.2105	24.2849	22.5683	22.5765	25.3346	21.9311	20.3067	20.2342	23.2098	19.6321
2014-08-05	23.2996	25.0635	23.8983	22.9431	24.2999	25.2016	25.0951	23.6526	24.5831	24.2331	25.702	23.769	22.7262	22.7268	25.0237	22.0369	20.4287	20.3329	23.3586	19.7501
2014-08-06	20.072	22.7147	20.3277	19.6953	21.4877	23.5977	22.2683	20.8808	23.8726	23.8244	23.9395	22.8597	22.6941	22.7239	24.2452	21.9053	20.5432	20.4303	23.2733	19.8441
2014-08-07	19.3543	21.3069	19.6473	19.4146	20.206	22.1342	20.5995	19.8711	22.8276	23.0927	22.1937	21.6689	22.4426	22.5287	23.1733	21.5464	20.6081	20.4881	22.9543	19.8683
2014-08-08	18.7125	20.8844	18.9956	19.1375	19.6361	21.5372	20.021	19.6677	22.0101	22.3836	21.3492	20.9704	22.0394	22.185	22.3017	21.073	20.6052	20.4906	22.4897	19.8037
2014-08-09	19.4265	20.5383	20.4629	19.9828	19.5215	20.9871	19.9321	19.7341	21.3537	21.8423	20.6003	20.4358	21.6309	21.8255	21.5849	20.6623	20.5283	20.4308	22.0219	19.6757
2014-08-10	21.1651	21.5329	22.5831	21.6793	21.0486	21.3467	21.8359	21.168	21.076	21.4587	21.4049	20.4073	21.2538	21.489	21.3506	20.3255	20.4138	20.3315	21.6105	19.5189
2014-08-11	21.7109	22.1567	23.13	21.7607	21.7431	21.8423	22.5612	21.5935	21.2456	21.4127	22.086	20.6837	21.0203	21.2547	21.5705	20.1788	20.2722	20.2185	21.3882	19.3642
2014-08-12	20.6894	21.8622	21.6186	20.7347	21.2335	21.7835	22.0765	20.9672	21.3821	21.4652	22.1867	20.7763	20.9391	21.1505	21.7264	20.1492	20.1481	20.1091	21.3279	19.2512
2014-08-13	21.019	21.7514	22.8813	21.4604	21.015	21.6004	21.9263	21.1077	21.2429	21.3934	21.6657	20.5693	20.8904	21.0794	21.5421	20.1014	20.0572	20.0236	21.3029	19.1775
2014-08-14	21.4037	22.1304	24.3525	21.7461	21.4824	21.7562	23.0839	21.4497	21.2108	21.3125	22.1958	20.6247	20.8052	20.9908	21.5517	20.0245	19.9893	19.9528	21.2212	19.1159
2014-08-15	22.1406	22.6253	25.6862	22.4134	22.0709	22.0705	24.1943	21.9277	21.3468	21.3287	22.9104	20.7345	20.7626	20.9291	21.7994	19.9951	19.9275	19.8866	21.1863	19.0619
2014-08-16	21.1291	22.2369	22.4989	20.4886	21.9601	22.1731	23.6067	21.1872	21.6103	21.4443	23.4556	20.949	20.791	20.9128	22.1995	20.0146	19.88	19.8369	21.2114	19.0207
2014-08-17	20.5355	21.2867	22.5722	20.7442	20.8253	21.3918	21.9842	20.5257	21.4382	21.3713	22.014	20.5146	20.8392	20.9179	21.8913	20.0214	19.8549	19.7976	21.2552	19.0018
2014-08-18	21.0348	21.6096	24.2088	21.4651	21.2983	21.4068	22.9871	21.1087	21.2449	21.1478	22.2299	20.3702	20.7772	20.8342	21.6689	19.8982	19.8463	19.7673	21.1689	18.9784
2014-08-19	21.8833	22.3456	25.6491	22.3418	21.9036	21.7758	24.1297	21.7887	21.3228	21.0962	22.889	20.4875	20.7153	20.7458	21.8271	19.8218	19.8228	19.7286	21.1124	18.9347
2014-08-20	23.2516	23.2161	25.1772	23.4639	23.1338	22.3705	24.2382	22.766	21.589	21.209	23.1651	20.7894	20.7246	20.712	22.0051	19.8304	19.7926	19.6821	21.1388	18.8927
2014-08-21	23.8264	23.8913	25.8731	23.8791	23.7571	22.9617	24.8725	23.2628	21.9789	21.4488	23.7053	21.1667	20.8247	20.7543	22.3754	19.9288	19.7802	19.6494	21.2607	18.8746
2014-08-22	23.4379	23.881	25.589	23.499	23.5874	23.165	24.8752	23.1405	22.2639	21.71	23.8961	21.4135	20.979	20.8591	22.6334	20.0736	19.7957	19.637	21.4263	18.8874
2014-08-23	22.8429	23.8832	25.276	22.8905	23.2916	23.205	24.6924	22.81	22.3801	21.855	23.8476	21.4637	21.1189	20.9707	22.7291	20.1978	19.8358	19.653	21.567	18.9288
2014-08-24	20.4223	22.8951	23.0984	20.7029	21.3982	22.7444	23.3238	21.0736	22.2972	21.9206	23.1505	21.2366	21.2159	21.055	22.5817	20.259	19.8827	19.6835	21.6508	18.9741
2014-08-25	20.6699	22.4742	22.9545	20.621	21.2865	22.3032	22.9311	20.7085	21.9553	21.7877	22.673	20.7877	21.2059	21.0845	22.2271	20.1843	19.9307	19.7162	21.6027	19.0057
2014-08-26	21.6115	22.2835	23.3972	21.1421	21.8922	22.1229	23.1394	20.9598	21.8278	21.6263	22.6745	20.576	21.1329	21.0357	22.0799	20.0401	19.95	19.7363	21.4967	19.0052
2014-08-27	22.4554	22.83	25.128	22.4168	22.5994	22.2732	24.1966	21.8903	21.8583	21.5068	23.3439	20.5854	21.0823	20.9707	22.4468	19.9327	19.9588	19.742	21.4853	18.9793
2014-08-28	22.0881	23.0805	25.1743	22.2625	22.3546	22.4987	24.2606	21.8595	21.9549	21.5231	23.5044	20.7232	21.0782	20.9281	22.5618	19.9053	19.9578	19.7317	21.4957	18.9435
2014-08-29	22.9184	23.6034	25.6804	22.9904	23.0075	22.8578	24.9483	22.4536	22.036	21.6022	23.9595	20.8644	21.0962	20.9254	22.7234	19.9206	19.9592	19.7233	21.5315	18.9231
2014-08-30	22.5197	23.486	24.862	22.5192	22.8534	22.9547	24.5648	22.3026	22.1708	21.7384	23.9788	21.0221	21.1447	20.9624	22.8907	19.9748	19.9666	19.7217	21.6102	18.9156
2014-08-31	22.5458	23.3538	25.5643	22.7254	22.6461	22.8053	24.4552	22.2213	22.1514	21.7786	23.6988	20.9939	21.187	21.0101	22.8438	20.0292	19.9883	19.7275	21.6735	18.9244
2014-09-01	22.0063	23.253	23.6312	21.7364	22.6865	22.9001	24.4168	21.9683	22.216	21.809	24.1251	21.1047	21.2078	21.039	22.978	20.0531	20.004	19.7465	21.7181	18.9377
2014-09-02	19.7683	21.7978	21.5859	19.3482	20.7653	22.016	22.0732	19.994	22.0406	21.7629	22.7282	20.7582	21.2354	21.0657	22.6951	20.0728	20.0232	19.7616	21.7645	18.9567
2014-09-03	19.7175	21.2321	22.5345	18.9998	20.3224	21.3547	22.0138	19.227	21.595	21.4586	22.0982	20.139	21.1463	21.0078	22.1604	19.9392	20.0338	19.778	21.6611	18.9637
2014-09-04	21.2043	21.6242	24.3748	19.9941	21.4116	21.418	23.3728	19.9249	21.4148	21.1762	22.6113	19.8875	20.9978	20.8696	22.0273	19.7167	20.0249	19.7679	21.4962	18.9286
2014-09-05	22.0325	22.1847	25.0358	20.8939	22.1775	21.7055	24.1808	20.5818	21.5348	21.0702	23.23	19.9299	20.9137	20.7447	22.2327	19.5723	19.9976	19.7371	21.4157	18.863
2014-09-06	22.141	22.5031	24.2291	21.4955	22.4029	22.0431	24.099	21.1932	21.7298	21.1237	23.5544	20.121	20.9158	20.6776	22.4867	19.5231	19.9639	19.6952	21.4345	18.7984
2014-09-07	21.9524	22.339	23.784	21.8442	22.199	21.9472	23.5393	21.4472	21.7861	21.3251	23.1582	20.2264	20.9585	20.6741	22.481	19.5424	19.9515	19.6617	21.4949	18.7578
2014-09-08	20.9018	22.0602	22.3131	20.7973	21.5284	21.8256	22.7308	20.8075	21.7637	21.3293	22.8693	20.2849	20.9761	20.6749	22.3969	19.5678	19.951	19.6418	21.5143	18.7315
2014-09-09	21.3743	22.2774	23.7309	21.4684	21.5462	21.8193	22.8456	21.0824	21.6022	21.266	22.4748	20.1747	20.9618	20.6632	22.1557	19.5693	19.9514	19.6242	21.4864	18.7204
2014-09-10	22.249	22.9107	24.7158	22.2571	22.3469	22.218	23.8884	21.737	21.6354	21.3059	23.0726	20.3169	20.9153	20.6365	22.2247	19.5582	19.9476	19.6078	21.4344	18.71
2014-09-11	20.5879	22.1824	21.3424	19.9682	21.4873	22.1341	22.7571	20.6428	21.7856	21.4583	23.169	20.5031	20.9302	20.6587	22.4461	19.6024	19.9439	19.599	21.464	18.7004
2014-09-12	18.569	20.4192	19.0213	18.5772	19.4618	20.9243	20.0899	19.0054	21.4411	21.2791	21.4721	19.9856	20.9395	20.6861	21.9817	19.6112	19.9436	19.5962	21.4904	18.705
2014-09-13	17.6531	19.6077	18.3565	18.1861	18.4431	20.1484	19.0486	18.4634	20.8028	20.8213	20.2901	19.4224	20.794	20.5828	21.2088	19.4418	19.9412	19.5948	21.3198	18.6974
2014-09-14	17.4576	19.1258	17.8976	17.4663	18.1477	19.6633	18.6947	18.0179	20.2659	20.4005	19.7518	19.0374	20.5404	20.3868	20.6186	19.2113	19.9085	19.5724	21.0292	18.6508
2014-09-15	16.5261	18.3474	17.1505	16.6719	17.3119	19.0138	17.87	17.1165	19.8028	20.0076	19.0623	18.6036	20.2649	20.1641	20.1151	18.9852	19.8323	19.5171	20.7281	18.5719
2014-09-16	15.7143	17.6414	16.0224	15.7258	16.595	18.4439	17.1331	16.4539	19.3367	19.5943	18.4989	18.186	19.9733	19.9229	19.6267	18.7208	19.7336	19.4354	20.4159	18.4673
2014-09-17	15.7433	17.002	16.2376	15.8698	16.228	17.7276	16.558	16.1181	18.7913	19.1127	17.6257	17.5939	19.6765	19.6627	19.0433	18.4414	19.6142	19.3358	20.0866	18.3437
2014-09-18	16.3876	17.1057	17.6968	16.4982	16.6879	17.5599	17.2137	16.5074	18.3947	18.6575	17.6015	17.2756	19.3573	19.3613	18.5931	18.1343	19.4703	19.2146	19.7346	18.2003
2014-09-19	16.8291	17.6225	18.5678	17.1459	17.1575	17.7828	18.2044	17.103	18.2947	18.4213	18.2165	17.2555	19.0816	19.0863	18.5678	17.898	19.3174	19.0771	19.4396	18.0419
2014-09-20	17.7382	17.9917	19.5832	17.9034	17.7803	18.0218	18.8866	17.68	18.3407	18.376	18.6687	17.4597	18.9089	18.8904	18.7286	17.7763	19.1612	18.9334	19.269	17.8941
2014-09-21	18.5529	18.5204	20.2628	18.3936	18.6054	18.338	19.7431	18.137	18.5204	18.4103	19.2928	17.6713	18.8169	18.7715	18.9865	17.7337	19.0188	18.7994	19.1943	17.7753
2014-09-22	17.7988	18.705	18.5589	17.6319	18.3208	18.6607	19.2363	17.9105	18.7593	18.5414	19.5065	17.8693	18.8059	18.7173	19.2698	17.7544	18.91	18.6901	19.213	17.687
2014-09-23	16.3832	17.9023	16.8568	16.4157	17.1301	18.2544	17.804	16.9133	18.6923	18.5892	18.7296	17.728	18.817	18.7079	19.13	17.7778	18.8289	18.5999	19.2486	17.6295
2014-09-24	16.2773	17.2347	17.4903	15.8888	16.6974	17.699	17.326	16.2568	18.337	18.3989	17.9176	17.3406	18.7496	18.6573	18.6665	17.701	18.7672	18.5313	19.1596	17.5866
2014-09-25	15.9372	16.9235	17.2873	15.5578	16.5457	17.3581	17.5571	15.8614	18.091	18.1284	18.0182	17.0362	18.5926	18.5363	18.4404	17.5392	18.6948	18.465	18.989	17.5241
2014-09-26	17.0301	17.5701	18.3296	17.2618	17.1512	17.5717	18.057	17.0137	17.9437	17.9138	18.1151	17.1134	18.4436	18.3859	18.3505	17.469	18.6089	18.3824	18.8412	17.4583
2014-09-27	17.9481	18.1747	19.1531	17.9845	17.8919	17.9696	18.6661	17.6897	18.0036	17.9409	18.4673	17.2807	18.3357	18.2652	18.4313	17.375	18.5206	18.2979	18.7412	17.3646
2014-09-28	17.2126	18.0795	17.6186	17.0598	17.6565	18.1238	18.2847	17.4118	18.17	18.0806	18.6544	17.4859	18.2886	18.2198	18.6051	17.3798	18.4354	18.217	18.7166	17.2892
2014-09-29	16.8692	17.3672	17.6837	16.5584	17.1188	17.6405	17.5429	16.7389	18.0699	18.0595	17.9883	17.3409	18.2798	18.2121	18.4223	17.3953	18.366	18.1489	18.701	17.2414
2014-09-30	16.3411	17.1545	16.8895	16.0187	16.9057	17.4592	17.5045	16.3939	17.9358	17.9021	17.9971	17.1681	18.2076	18.1548	18.2598	17.3234	18.3064	18.0956	18.618	17.2005
2014-10-01	16.1948	16.9694	16.9796	16.1465	16.5533	17.244	17.1053	16.3956	17.7581	17.7506	17.5807	16.9648	18.1171	18.0649	18.0595	17.2314	18.2448	18.0391	18.5192	17.1489
2014-10-02	16.2098	16.6751	17.2997	15.0975	16.4443	17.0001	17.1153	15.6055	17.5718	17.5972	17.4225	16.7967	18.0032	17.9618	17.8683	17.1441	18.179	17.9772	18.3937	17.0883
2014-10-03	16.2299	16.7507	17.0052	15.2918	16.6504	16.9779	17.3249	15.5793	17.5021	17.4413	17.6451	16.5597	17.8815	17.8522	17.8307	17.0157	18.1036	17.9111	18.2771	17.0184
2014-10-04	15.839	16.5957	16.764	14.5389	16.3542	16.8819	17.0443	15.2464	17.4427	17.3414	17.4325	16.4292	17.7992	17.7494	17.7654	16.8798	18.022	17.8361	18.1932	16.9386
2014-10-05	15.1025	15.8268	16.1993	12.7885	15.6956	16.4158	16.4655	13.8288	17.2921	17.2119	17.0804	16.0801	17.7205	17.6574	17.6076	16.7473	17.9506	17.7669	18.1095	16.8539
2014-10-06	14.7239	15.2168	15.7663	12.3325	15.3564	15.9038	16.119	13.1143	17.0722	16.9415	16.8305	15.5555	17.6104	17.5328	17.399	16.5258	17.8799	17.6944	17.9955	16.7582
2014-10-07	15.2763	15.3208	15.9952	13.8138	15.6255	15.7712	16.2412	13.9383	16.8856	16.6715	16.7598	15.2219	17.4773	17.3647	17.2367	16.2481	17.803	17.6125	17.8711	16.6353
2014-10-08	16.1697	15.7202	16.8954	15.1038	16.1724	15.9054	16.6337	14.937	16.8055	16.5348	16.802	15.251	17.3527	17.1898	17.1602	16.0439	17.7238	17.5201	17.7577	16.4922
2014-10-09	17.0652	16.2232	18.2096	15.5168	16.8709	16.1926	17.4181	15.4459	16.8621	16.521	17.1551	15.4627	17.2581	17.0585	17.2273	15.9642	17.6367	17.4177	17.6679	16.3572
2014-10-10	16.258	16.1972	17.0033	15.0007	16.6622	16.3354	17.4198	15.2278	17.0336	16.6051	17.6048	15.635	17.2269	16.9907	17.4773	15.972	17.5603	17.3256	17.6494	16.2543
2014-10-11	13.6876	15.2038	13.8085	12.628	15.0705	15.9211	15.7936	13.9992	17.0132	16.6152	17.0562	15.6176	17.2329	16.9681	17.4659	15.9873	17.4994	17.2542	17.6804	16.185
2014-10-12	11.0668	13.214	10.9376	10.2981	12.5559	14.5687	13.0406	11.7268	16.4881	16.2965	15.3009	15.019	17.1708	16.9098	16.841	15.9103	17.4483	17.1867	17.624	16.1293
2014-10-13	10.2132	11.9677	10.5145	8.81493	11.3904	13.4451	11.7873	10.2585	15.6664	15.6569	13.9084	14.176	16.9275	16.7132	15.9057	15.6259	17.387	17.1137	17.3571	16.0524
2014-10-14	11.5198	11.8613	12.5374	9.09491	11.9854	12.9714	12.5132	9.95971	15.0071	15.0194	13.6133	13.1235	16.5657	16.3971	15.222	15.081	17.2806	17.0099	16.955	15.9124
2014-10-15	12.6115	12.2506	14.0533	9.63735	12.987	13.0226	13.9386	10.4233	14.788	14.6227	14.2749	12.8356	16.2158	16.0507	15.1021	14.6794	17.1339	16.8719	16.5952	15.723
2014-10-16	12.6088	12.342	14.109	9.69202	13.0646	13.0279	14.295	10.3412	14.786	14.4321	14.7022	12.6651	15.9829	15.7697	15.2683	14.3912	16.9626	16.7099	16.3901	15.5138
2014-10-17	13.9648	12.8055	15.5943	10.847	13.8782	13.1961	14.9723	11.0933	14.7679	14.3123	14.9378	12.5494	15.8364	15.5551	15.3499	14.1552	16.8101	16.5503	16.2814	15.3146
2014-10-18	13.7483	13.0447	14.9202	11.4721	14.1243	13.4402	15.3345	11.6067	14.9244	14.3282	15.5514	12.6751	15.7379	15.3937	15.6161	13.9931	16.67	16.3974	16.2367	15.1311
2014-10-19	14.9445	13.7221	16.1484	13.1181	14.7548	13.7642	15.6144	12.8909	15.0183	14.3735	15.5141	12.8639	15.705	15.2893	15.7065	13.9124	16.5576	16.2524	16.2415	14.9746
2014-10-20	13.3441	13.2756	14.1156	11.4495	14.0661	13.7471	15.0954	12.0465	15.1754	14.4918	15.7053	13.1244	15.6978	15.2401	15.8714	13.9193	16.467	16.1333	16.261	14.8493
2014-10-21	13.9615	13.0853	15.0651	11.6064	13.9172	13.4883	14.6748	11.9162	15.0453	14.4335	15.0681	12.989	15.6916	15.2038	15.6811	13.9232	16.3885	16.0277	16.2617	14.7558
2014-10-22	14.8212	13.5689	16.1817	11.9315	14.7264	13.7109	15.7866	12.1406	15.0191	14.3652	15.6103	12.9812	15.6305	15.1295	15.6809	13.8726	16.3231	15.939	16.2008	14.6784
2014-10-23	15.339	13.9797	16.7627	12.021	15.2018	14.0095	16.3148	12.305	15.1748	14.4286	16.0374	13.034	15.6021	15.0742	15.9021	13.8354	16.2534	15.8593	16.1865	14.6043
2014-10-24	15.5875	14.1298	17.0931	11.9372	15.4758	14.1737	16.7343	12.2431	15.3532	14.5451	16.4156	13.0632	15.6244	15.0588	16.1482	13.8157	16.1938	15.7845	16.2386	14.5357
2014-10-25	16.1546	14.3475	17.6875	12.2716	15.9181	14.3468	17.2232	12.4687	15.5231	14.6502	16.7692	13.0837	15.6648	15.0638	16.389	13.7933	16.1527	15.72	16.3229	14.4773
2014-10-26	15.7989	14.3229	17.3163	11.8206	15.851	14.4187	17.2714	12.2514	15.7051	14.7618	17.0349	13.12	15.7341	15.0818	16.6397	13.7852	16.1258	15.6744	16.4346	14.4248
2014-10-27	14.9683	14.0805	16.2817	11.374	15.3498	14.3232	16.79	11.8362	15.7882	14.8225	16.9891	13.0382	15.8066	15.1006	16.7757	13.7662	16.1123	15.6366	16.5599	14.3783
2014-10-28	13.6247	13.7291	14.4997	11.4665	14.4232	14.1412	15.6387	11.8465	15.7191	14.8241	16.4725	12.9093	15.8475	15.105	16.6929	13.7132	16.1083	15.6096	16.6486	14.3345
2014-10-29	11.8505	12.8573	12.1513	10.5858	12.9904	13.6073	13.8484	11.2369	15.4247	14.727	15.4176	12.7612	15.8266	15.0813	16.2963	13.6409	16.1068	15.5829	16.6511	14.2843
2014-10-30	11.6661	12.1921	12.0545	10.5613	12.3078	12.991	12.8769	10.9422	14.9132	14.4551	14.3029	12.4546	15.7033	15.0016	15.6219	13.5312	16.0889	15.5469	16.5034	14.2277
2014-10-31	10.6326	11.7747	10.9429	9.50867	11.7673	12.6569	12.491	10.4308	14.5232	14.1555	13.953	12.291	15.495	14.8588	15.1404	13.3837	16.0433	15.5009	16.2514	14.1549

## Sheet: Growing season in 2015
Date	Daily mean soil temperature (℃)
	10 cm				20 cm				40 cm				60 cm				100 cm
	Soybean sloping field	Maize terraced field	Jujube orchard	Grassland	Soybean sloping field	Maize terraced field	Jujube orchard	Grassland	Soybean sloping field	Maize terraced field	Jujube orchard	Grassland	Soybean sloping field	Maize terraced field	Jujube orchard	Grassland	Soybean sloping field	Maize terraced field	Jujube orchard	Grassland
2015-05-01	17.2386	18.0154	17.8961	16.2023	17.9955	17.1333	19.1306	16.8373	16.16	15.3696	18.9296	14.8403	13.4385	13.2675	17.1614	11.8215	11.3449	11.6877	14.5528	9.6641
2015-05-02	16.7756	16.5527	18.1431	16.5389	16.4678	16.0507	17.2925	15.8076	15.7942	15.3731	17.0957	14.1852	13.6873	13.5143	16.5941	12.0804	11.5481	11.8844	14.7875	9.91936
2015-05-03	18.7614	17.4018	20.1949	17.9242	18.044	16.3329	18.9542	17.237	15.5675	15.1992	17.6071	14.2282	13.724	13.6206	16.3463	12.1194	11.7405	12.068	14.797	10.1482
2015-05-04	18.5998	17.395	20.0611	17.7672	17.9402	16.3936	18.9002	16.994	15.6988	15.2805	17.7709	14.3724	13.7735	13.6969	16.519	12.2312	11.8924	12.2248	14.8432	10.3293
2015-05-05	18.3843	17.8437	19.3115	17.413	18.343	16.7644	19.2901	17.1854	15.8691	15.4027	18.2512	14.5919	13.8656	13.7823	16.7016	12.359	12.0222	12.3521	14.9415	10.4965
2015-05-06	16.1939	16.7689	16.9113	15.7386	16.4779	16.2693	17.2239	15.7306	15.8936	15.5319	17.3302	14.4752	13.9945	13.9042	16.6374	12.507	12.1463	12.4775	15.0603	10.6553
2015-05-07	14.5975	15.7427	14.7154	13.8162	15.2822	15.6205	15.7994	14.419	15.5805	15.3942	16.4407	14.1408	14.0477	13.9953	16.2093	12.5538	12.2745	12.6034	15.0817	10.8076
2015-05-08	16.1905	15.6106	17.2439	16.246	15.5471	15.1197	15.9225	15.183	15.1044	15.0756	15.5871	13.6159	13.9903	13.9981	15.6232	12.4983	12.382	12.7056	14.9812	10.9326
2015-05-09	19.0822	17.2745	20.9039	19.4345	17.9047	15.9685	18.6813	17.8634	15.0986	14.9652	16.8365	13.9874	13.8737	13.9331	15.6705	12.4137	12.4463	12.7732	14.8283	11.0188
2015-05-10	15.7111	16.9944	16.198	14.9877	16.8026	16.3706	17.8869	16.0688	15.5731	15.2706	17.7199	14.6974	13.8963	13.9505	16.3018	12.5428	12.4986	12.8179	14.8699	11.0862
2015-05-11	11.7819	14.0495	12.5307	11.6582	12.8442	14.6334	13.7232	12.4429	15.2185	15.235	15.2389	13.8724	14.0074	14.0567	15.8178	12.7075	12.551	12.8783	14.9737	11.1802
2015-05-12	15.0899	14.3748	16.2939	14.8813	14.3485	14.1559	15.0133	14.1037	14.4362	14.6818	14.6787	13.1604	13.8875	14.0144	14.9597	12.5502	12.6132	12.9445	14.8129	11.2763
2015-05-13	18.4687	16.2777	20.3508	18.6458	17.0054	15.084	17.986	17.0855	14.4462	14.5135	16.0581	13.5612	13.6875	13.8705	15.0461	12.3951	12.6362	12.965	14.5892	11.3212
2015-05-14	19.3616	17.8021	20.6901	19.3057	18.4576	16.2913	19.6127	18.4199	15.0211	14.8355	17.7492	14.5183	13.6638	13.8313	15.8288	12.4982	12.6351	12.959	14.5775	11.3401
2015-05-15	19.7057	18.1275	21.4992	19.5683	18.5848	16.76	19.6928	18.5473	15.5369	15.2827	17.9592	15.0016	13.828	13.9429	16.3553	12.7924	12.6439	12.9724	14.7767	11.3996
2015-05-16	20.0969	18.4233	22.1571	20.0585	19.0281	17.1207	20.5981	18.9348	15.8892	15.6334	18.7195	15.3962	14.0318	14.1286	16.8081	13.0701	12.7008	13.0377	15.0003	11.5074
2015-05-17	21.5868	19.7167	23.4332	21.9076	20.2423	17.9425	21.7043	20.4445	16.2834	15.9788	19.528	15.9036	14.2476	14.3288	17.3258	13.3461	12.78	13.1371	15.2638	11.6457
2015-05-18	22.5089	20.6487	24.4447	22.6814	20.9794	18.7471	22.406	21.2583	16.7887	16.4868	20.1261	16.5284	14.5008	14.5751	17.858	13.676	12.885	13.2634	15.5649	11.8039
2015-05-19	22.4994	20.9024	24.4237	21.9057	21.3696	19.2688	22.9643	21.0951	17.3052	17.0143	20.8431	17.0878	14.7938	14.8732	18.4126	14.0437	13.0117	13.4166	15.8894	11.9893
2015-05-20	20.844	20.1448	21.9597	20.2493	20.4232	19.0557	21.8219	19.8727	17.6583	17.3917	20.7687	17.2292	15.1027	15.2011	18.787	14.3956	13.1683	13.6037	16.238	12.201
2015-05-21	18.1919	19.0063	18.2953	17.1052	18.7516	18.5013	19.5733	17.8969	17.6834	17.4862	19.7625	17.0034	15.365	15.467	18.668	14.6202	13.3452	13.7942	16.5228	12.4173
2015-05-22	18.8784	17.9504	20.0135	18.3609	17.9132	17.4689	18.5265	17.565	17.2364	17.2434	18.171	16.2473	15.4809	15.6166	17.9569	14.6691	13.5101	13.9763	16.5978	12.6136
2015-05-23	21.3786	19.3919	23.1725	21.2576	19.9841	18.1005	21.1785	19.9355	17.0921	17.0402	19.2855	16.3995	15.4484	15.6264	17.8604	14.5866	13.6465	14.1219	16.5112	12.7553
2015-05-24	22.798	20.6553	24.4577	22.9169	21.3132	18.999	22.6142	21.4721	17.4771	17.2772	20.4392	17.0533	15.4872	15.6644	18.3841	14.6773	13.7399	14.2204	16.542	12.8577
2015-05-25	23.4077	21.5661	24.8328	23.5653	22.0967	19.7897	23.384	22.2553	17.9873	17.7025	21.2846	17.731	15.6629	15.8125	18.9733	14.9294	13.8332	14.3211	16.7292	12.9729
2015-05-26	24.2679	22.2938	25.9117	24.4935	22.6791	20.4203	23.8556	22.9396	18.4514	18.1613	21.6416	18.2198	15.9122	16.0466	19.4017	15.2518	13.9431	14.4453	16.9869	13.1184
2015-05-27	25.28	23.1584	26.921	25.2035	23.664	21.1631	24.9576	23.6959	18.9135	18.6422	22.5048	18.7794	16.1954	16.3296	19.9045	15.5816	14.0872	14.6049	17.2672	13.2927
2015-05-28	23.6579	23.0888	24.4405	22.8035	23.234	21.5635	24.3257	22.6179	19.4422	19.1547	22.9435	19.2638	16.5105	16.6406	20.4719	15.9382	14.2531	14.7877	17.6051	13.4886
2015-05-29	22.5297	22.0335	23.2489	22.0504	21.8955	20.9612	22.6046	21.4384	19.5131	19.3857	21.7954	18.9696	16.8183	16.9603	20.3698	16.2335	14.4352	14.9984	17.9106	13.7072
2015-05-30	22.6338	21.7762	23.7718	22.461	21.7586	20.7017	22.5147	21.4912	19.375	19.3653	21.4294	18.7547	16.9925	17.18	20.1251	16.3445	14.6282	15.2186	18.0493	13.9163
2015-05-31	22.6756	22.0375	23.6812	22.7318	21.9852	20.847	22.9092	21.8447	19.3636	19.3746	21.7208	18.8355	17.0907	17.3145	20.1413	16.4074	14.7988	15.4069	18.1201	14.0928
2015-06-01	23.8956	22.537	25.1385	24.1097	22.6115	21.0857	23.4248	22.7158	19.423	19.4631	21.8027	18.9778	17.1883	17.4347	20.19	16.5043	14.9376	15.5636	18.1975	14.2403
2015-06-02	23.7149	22.7412	24.9157	23.6175	22.8431	21.4165	23.7912	22.725	19.6459	19.6677	22.3047	19.3138	17.3012	17.5695	20.4466	16.6459	15.07	15.7059	18.3064	14.3764
2015-06-03	22.1543	22.1824	22.679	21.3225	22.0961	21.2747	22.8955	21.4639	19.8205	19.8354	22.2463	19.4131	17.4553	17.7287	20.638	16.8256	15.2043	15.8461	18.4699	14.5134
2015-06-04	20.7317	20.9379	21.1256	20.3981	20.537	20.4362	20.9756	20.0747	19.637	19.7701	20.9596	18.9097	17.5783	17.8662	20.3124	16.9259	15.3346	15.9903	18.5797	14.6578
2015-06-05	22.6345	21.4185	23.8768	23.1531	21.3924	20.404	22.0754	21.6381	19.3227	19.5486	20.8355	18.6593	17.5787	17.9006	19.915	16.8681	15.4554	16.1224	18.5362	14.7815
2015-06-06	23.7176	22.365	25.0749	23.9989	22.6345	21.0518	23.6455	22.8173	19.4411	19.6208	21.9332	19.1298	17.5599	17.9074	20.1723	16.8657	15.5511	16.2188	18.4899	14.8694
2015-06-07	22.9072	22.068	23.9959	22.5842	22.3122	21.1098	23.2673	22.0959	19.708	19.8332	22.1556	19.4314	17.6395	17.9886	20.5152	17.0122	15.6284	16.2993	18.5888	14.9499
2015-06-08	23.4193	21.9232	24.7825	23.8913	22.3171	20.9005	23.2353	22.4418	19.7532	19.8767	21.9333	19.3396	17.7529	18.0986	20.5338	17.1459	15.7115	16.3942	18.7058	15.0521
2015-06-09	25.146	23.188	26.4526	25.9382	23.744	21.6118	24.6652	24.2187	19.9095	19.9617	22.6897	19.7469	17.8338	18.1746	20.7308	17.2402	15.8011	16.49	18.7886	15.1559
2015-06-10	24.1205	23.4085	24.7998	24.1889	23.5714	22.1076	24.3974	23.6459	20.3072	20.306	23.1419	20.2872	17.9742	18.2967	21.1379	17.4509	15.8989	16.5783	18.9362	15.2618
2015-06-11	22.3444	22.1894	22.725	22.559	21.9722	21.5204	22.4394	22.0119	20.3619	20.4929	22.1312	20.1014	18.1612	18.482	21.0618	17.6693	15.9972	16.6868	19.1079	15.3897
2015-06-12	23.9985	22.3793	24.8639	24.4698	22.7446	21.4007	23.2781	23.0768	20.1682	20.4166	21.9932	19.9207	18.247	18.6	20.7805	17.7316	16.114	16.8087	19.1484	15.5189
2015-06-13	24.2105	22.7079	24.9947	24.4775	23.2339	21.6549	23.8278	23.3872	20.2902	20.4714	22.5171	20.1818	18.282	18.6628	20.9416	17.7904	16.2185	16.9156	19.166	15.6299
2015-06-14	24.5459	22.9305	25.6983	25.1415	23.5231	21.8001	24.2592	23.7631	20.4608	20.5886	22.7656	20.3523	18.3732	18.7525	21.106	17.9094	16.3086	17.0115	19.2404	15.7307
2015-06-15	25.2625	23.6716	26.6328	26.2775	24.1135	22.2684	24.9752	24.7032	20.663	20.757	23.231	20.6595	18.4878	18.8522	21.3502	18.0444	16.3973	17.11	19.3492	15.841
2015-06-16	24.0051	23.4767	24.5588	24.5022	23.514	22.3921	24.1799	23.8436	20.8802	20.9869	23.2494	20.9572	18.6273	18.9849	21.5788	18.2324	16.4943	17.2108	19.4857	15.9577
2015-06-17	24.7665	23.5181	25.4743	25.4178	23.6098	22.3415	23.9465	23.9961	20.8739	21.0823	22.7439	20.8424	18.7599	19.1317	21.4387	18.3901	16.5941	17.3276	19.5941	16.0889
2015-06-18	26.2783	24.2826	27.3726	26.7642	24.7025	22.7914	25.149	25.0171	20.9938	21.2056	23.275	21.0495	18.8423	19.247	21.5334	18.4878	16.6937	17.4405	19.6382	16.2102
2015-06-19	26.7889	24.7505	27.9564	27.1081	25.4542	23.2677	26.162	25.5457	21.3368	21.4692	24.1295	21.4678	18.9643	19.3785	21.9307	18.6419	16.7918	17.5522	19.733	16.324
2015-06-20	24.8598	24.9198	25.1837	24.5995	24.7761	24.6269	25.374	24.4764	21.6959	21.7398	24.3837	21.7304	19.1563	19.5466	22.3322	19.1947	16.8929	17.6662	19.9366	16.5898
2015-06-21	22.1421	22.6469	22.4411	21.9841	22.3726	22.9096	22.6738	22.1422	21.5983	21.7531	22.8434	21.298	19.3496	19.7158	22.0648	19.3582	17.0128	17.7944	20.1206	16.7354
2015-06-22	21.8979	21.8411	22.4157	22.3091	21.7159	21.5048	22.1049	21.9354	21.0946	20.7716	21.9415	20.6773	19.3796	19.3598	21.4706	19.2963	17.1396	16.9935	20.0946	16.8646
2015-06-23	20.9563	21.5657	21.1948	21.2893	21.3509	21.2853	21.7618	21.5818	20.7848	20.4719	21.7764	20.5075	19.2907	19.286	21.1711	19.1591	17.2335	17.0913	19.9783	16.9381
2015-06-24	19.8431	20.5049	19.932	19.8804	20.0974	20.5094	20.3618	20.1598	20.4257	20.2228	20.8511	20.0774	19.1849	19.198	20.7758	19.05	17.2916	17.1532	19.8665	16.9764
2015-06-25	22.357	21.3368	23.0785	22.5666	21.2352	20.4966	21.3806	21.5199	20.0107	19.879	20.5662	19.6542	19.0241	19.0565	20.3115	18.8629	17.3173	17.1852	19.6795	16.9901
2015-06-26	25.0732	23.6063	26.4434	25.6831	23.5855	21.8388	24.1959	24.1488	20.145	19.8708	22.0498	20.0871	18.8807	18.9259	20.5632	18.7392	17.3163	17.1866	19.5194	16.9727
2015-06-27	25.7366	24.9668	27.3229	26.7891	24.5798	23.077	25.5871	25.4746	20.6981	20.3195	23.4321	20.7921	18.9085	18.9672	21.2965	18.8681	17.3088	17.1839	19.5618	16.9609
2015-06-28	24.2578	24.7209	24.9566	24.6843	24.1273	23.5007	25.0439	24.641	21.2046	20.8741	23.9655	21.4383	19.0842	19.1767	21.9068	19.1638	17.3235	17.2145	19.7711	17.0064
2015-06-29	22.3258	22.9743	22.6302	22.6027	22.3675	22.5297	22.7389	22.6173	21.2454	21.0962	22.6793	21.2097	19.2937	19.4264	21.7929	19.4189	17.3861	17.2894	19.9877	17.114
2015-06-30	23.8156	23.0966	24.1931	24.0885	22.899	22.2571	23.0308	23.2521	20.9866	20.927	22.1869	20.8344	19.369	19.5264	21.3868	19.44	17.4707	17.3859	20.018	17.2286
2015-07-01	24.9278	23.5944	25.5125	25.2555	23.8724	22.5334	24.1517	24.2025	21.0429	20.8685	22.7236	21.0909	19.3682	19.5375	21.433	19.4172	17.5398	17.4697	19.978	17.3048
2015-07-02	25.7906	24.3566	26.5929	26.0804	24.8334	23.092	25.4302	25.0956	21.3482	20.991	23.6831	21.4932	19.4253	19.5776	21.8112	19.4929	17.5933	17.5392	20.0222	17.3606
2015-07-03	25.9802	24.7982	27.1131	26.3857	25.0482	23.4552	25.7206	25.3238	21.6907	21.2223	24.0334	21.7899	19.5675	19.6831	22.1838	19.6597	17.6524	17.605	20.1642	17.4315
2015-07-04	26.3661	25.451	27.3397	27.2613	25.4526	23.9602	26.1181	26.0272	21.9725	21.4805	24.5027	22.0554	19.7426	19.8285	22.5251	19.834	17.7343	17.6822	20.3419	17.523
2015-07-05	26.071	25.6471	26.7892	26.8919	25.4472	24.2919	26.0444	26.0794	22.2362	21.7769	24.7198	22.421	19.9223	20.009	22.803	20.0373	17.8261	17.7709	20.5372	17.6303
2015-07-06	26.1392	25.6306	27.3224	27.5013	25.312	24.3125	25.9113	26.2668	22.3649	21.9985	24.5151	22.5222	20.0988	20.2028	22.8725	20.2448	17.9322	17.8764	20.7149	17.7537
2015-07-07	26.5982	25.9741	28.0988	27.9618	25.6588	24.5735	26.5185	26.7245	22.4789	22.1674	24.8812	22.7964	20.2389	20.3662	23.0264	20.4111	18.0407	17.9899	20.8434	17.8844
2015-07-08	27.3688	26.6356	28.805	28.4688	26.3602	25.0576	27.388	27.248	22.6845	22.3827	25.5138	23.0684	20.3682	20.5265	23.3447	20.6005	18.1468	18.1089	20.9847	18.0116
2015-07-09	26.9091	26.7123	27.7682	27.6336	26.3157	25.3369	27.0756	26.8989	22.9744	22.6724	25.7369	23.2194	20.5342	20.7207	23.6853	20.8169	18.2593	18.2318	21.1885	18.1455
2015-07-10	26.5917	26.376	27.8909	27.8269	25.8752	25.1551	26.5568	26.675	23.091	22.8534	25.3175	23.4193	20.7072	20.9208	23.6979	20.9948	18.3738	18.3606	21.3805	18.2862
2015-07-11	27.2483	26.8015	28.9215	28.672	26.299	25.3785	27.3023	27.2921	23.1455	22.9483	25.6462	23.5132	20.834	21.0709	23.7812	21.1027	18.4858	18.4911	21.4998	18.4194
2015-07-12	28.1914	27.4753	30.008	29.411	27.0612	25.8608	28.24	27.9929	23.3395	23.1328	26.2778	23.6648	20.9493	21.2109	24.0832	21.2441	18.6015	18.6168	21.6327	18.5391
2015-07-13	29.0661	28.2021	31.2206	30.2195	27.863	26.4238	29.2578	28.6968	23.6679	23.4154	26.992	24.0287	21.1061	21.3885	24.5137	21.4405	18.7115	18.7396	21.8242	18.662
2015-07-14	28.7426	28.19	30.2306	29.1274	27.9862	26.7067	29.3398	28.2734	24.0473	23.7534	27.5119	24.3372	21.3227	21.6118	24.9857	21.6773	18.8263	18.8735	22.0668	18.8006
2015-07-15	25.3169	26.1858	25.5282	25.2069	25.8536	25.8595	26.3817	25.6526	24.237	23.9401	26.4951	24.2077	21.5597	21.8397	25.0387	21.8783	18.9596	19.0209	22.3439	18.9506
2015-07-16	25.0863	25.0847	25.9164	25.5786	24.7991	24.6805	25.2623	24.9852	23.803	23.6439	24.962	23.468	21.6905	21.9411	24.3214	21.8756	19.1048	19.1733	22.4298	19.0936
2015-07-17	24.5488	24.9426	25.3257	24.7248	24.6638	24.5285	25.2762	24.7114	23.4842	23.3258	24.9072	23.2086	21.6403	21.8751	23.9767	21.7216	19.232	19.2967	22.3326	19.1834
2015-07-18	24.0077	24.3133	24.8074	24.6131	23.9082	23.9438	24.4847	24.1617	23.1942	23.0811	24.2611	22.8325	21.5737	21.7925	23.6565	21.5969	19.3156	19.3808	22.2389	19.2244
2015-07-19	25.0601	24.7862	26.196	26.1554	24.4231	23.9924	24.9659	25.0008	22.941	22.839	24.1521	22.7995	21.4692	21.6743	23.3762	21.4455	19.3692	19.4281	22.0953	19.2376
2015-07-20	26.1536	25.8401	27.3657	27.2524	25.5004	24.6288	26.2912	26.2532	22.9888	22.816	24.8975	23.0751	21.3917	21.5903	23.4857	21.3726	19.396	19.4563	21.9905	19.2299
2015-07-21	25.105	25.4143	25.7035	25.7402	24.9142	24.6138	25.415	25.2952	23.1627	22.9608	24.8217	23.1207	21.4041	21.5975	23.6591	21.4376	19.4186	19.4743	21.9966	19.2345
2015-07-22	24.2844	24.99	25.3198	25.0015	24.3256	24.3447	24.936	24.7827	23.118	22.9653	24.403	22.9977	21.4408	21.6308	23.514	21.4782	19.4459	19.5006	22.0175	19.2674
2015-07-23	24.6427	24.9965	26.042	25.4332	24.3068	24.226	25.1216	24.7825	22.9925	22.8843	24.3129	22.8284	21.4393	21.632	23.3834	21.4521	19.4858	19.5336	21.9904	19.2968
2015-07-24	25.9821	25.5841	27.7519	26.6721	25.2135	24.5436	26.2178	25.6924	22.9944	22.8586	24.7986	22.892	21.4182	21.6115	23.4661	21.4104	19.5121	19.5615	21.9571	19.3165
2015-07-25	27.4393	26.4356	29.4401	28.1361	26.4005	25.0814	27.6522	26.8468	23.2296	22.9826	25.7118	23.1894	21.4443	21.629	23.8352	21.4453	19.5415	19.588	21.9853	19.3326
2015-07-26	28.731	27.6472	30.8285	29.7451	27.5953	25.9214	28.9602	28.2327	23.6588	23.2574	26.7248	23.6959	21.5544	21.717	24.3885	21.587	19.5746	19.6207	22.124	19.3625
2015-07-27	29.1719	28.3869	31.2745	30.3982	28.1385	26.6044	29.5594	28.944	24.1477	23.6651	27.4097	24.2625	21.7518	21.892	24.9399	21.8392	19.633	19.6679	22.352	19.428
2015-07-28	29.4845	28.9058	31.4744	30.8165	28.5157	27.1274	29.8739	29.3791	24.5703	24.0734	27.8343	24.7294	21.9934	22.1246	25.3739	22.1377	19.7202	19.7483	22.6182	19.5311
2015-07-29	29.1849	28.8921	30.514	29.8211	28.5522	27.4032	29.6573	29.0225	24.9302	24.4407	28.073	25.1107	22.2477	22.3795	25.7234	22.4358	19.8299	19.8519	22.882	19.6651
2015-07-30	29.264	28.7116	30.8066	30.1234	28.371	27.2641	29.2591	28.7791	25.1015	24.6523	27.6861	25.0995	22.4898	22.6191	25.7721	22.6806	19.9615	19.9767	23.1148	19.8185
2015-07-31	30.1035	29.5216	31.872	31.3478	29.1439	27.788	30.2571	29.76	25.3001	24.823	28.2756	25.5445	22.673	22.7973	25.9672	22.8308	20.0993	20.1106	23.2803	19.9644
2015-08-01	29.714	29.6126	31.3929	30.903	29.1161	28.0963	30.2811	29.8129	25.6	25.1139	28.6059	25.8996	22.8696	22.993	26.3006	23.038	20.2398	20.2454	23.4839	20.1023
2015-08-02	25.8278	27.4583	26.3768	26.1331	26.7301	27.1851	27.8103	26.969	25.6993	25.2917	27.8879	25.6731	23.0855	23.2049	26.3656	23.2555	20.3932	20.3879	23.7151	20.2513
2015-08-03	22.7882	24.7887	23.0447	22.9406	23.7875	25.2832	24.3634	23.9465	25.0649	24.9297	25.5797	24.89	23.1784	23.3007	25.5283	23.2726	20.543	20.5319	23.8099	20.3999
2015-08-04	22.0618	23.3464	22.8951	22.8938	22.4502	23.8047	23.0674	22.9262	24.0733	24.1947	23.8889	23.6908	23.0006	23.1411	24.3995	22.9675	20.6551	20.6405	23.5998	20.4885
2015-08-05	22.7801	23.4486	24.214	23.6836	22.7914	23.4673	23.7144	23.5128	23.374	23.534	23.654	23.0604	22.671	22.8329	23.7209	22.5393	20.6997	20.6857	23.2361	20.4793
2015-08-06	24.3061	23.9179	25.7375	24.7058	23.8754	23.5443	24.8297	24.2587	23.115	23.1717	24.1008	22.9727	22.3651	22.5398	23.5497	22.2369	20.6741	20.6668	22.9215	20.405
2015-08-07	25.8164	24.5386	27.4738	25.8236	25.1767	23.8745	26.115	25.1738	23.2672	23.0554	24.8447	23.1455	22.1925	22.3394	23.7254	22.0958	20.6196	20.6146	22.739	20.3249
2015-08-08	26.2272	25.0441	27.65	26.0547	25.8674	24.2528	26.8649	25.6527	23.634	23.1194	25.6292	23.4425	22.1771	22.2445	24.1212	22.0903	20.5702	20.558	22.707	20.2674
2015-08-09	25.8898	25.2048	27.3059	26.0377	25.6048	24.4267	26.4932	25.5346	23.8766	23.2244	25.5782	23.5332	22.257	22.2356	24.3306	22.1554	20.5512	20.5145	22.7792	20.2467
2015-08-10	26.9872	25.9228	28.2422	26.9867	26.469	24.8881	27.2878	26.2973	24.0598	23.3331	25.9996	23.6898	22.3474	22.2511	24.4862	22.2023	20.5637	20.4915	22.8473	20.2498
2015-08-11	25.0445	25.5083	25.3536	24.6339	25.5992	25.0207	26.1163	25.0959	24.3467	23.549	25.9874	23.9073	22.4723	22.3201	24.7319	22.2933	20.5967	20.4901	22.9637	20.2682
2015-08-12	24.4712	24.5845	25.6862	24.7543	24.4442	24.283	24.9967	24.393	24.0901	23.5101	24.7675	23.4263	22.5729	22.3903	24.3205	22.3225	20.648	20.5041	23.0249	20.305
2015-08-13	24.4312	24.4971	25.0866	24.0361	24.6097	24.14	25.2694	24.2016	23.8314	23.3358	24.8875	23.2511	22.5264	22.3627	24.1013	22.2046	20.699	20.5332	22.9505	20.3227
2015-08-14	22.7543	23.748	24.5865	22.8751	23.2244	23.6566	24.0918	22.9725	23.6267	23.1847	24.0799	22.9064	22.4648	22.3049	23.8299	22.1006	20.7223	20.5487	22.8734	20.3148
2015-08-15	24.1121	23.8101	26.2129	23.8026	23.9158	23.4761	25.1588	23.4366	23.3492	22.9618	24.3326	22.5735	22.3586	22.2104	23.6273	21.9231	20.7346	20.5497	22.7447	20.2898
2015-08-16	25.5324	24.5579	26.9529	24.842	25.1183	23.8746	26.1478	24.3359	23.4367	22.8729	25.0518	22.6343	22.272	22.11	23.8192	21.7842	20.7265	20.5355	22.6648	20.2386
2015-08-17	25.7335	25.2073	27.6525	25.5011	25.4729	24.312	26.5647	24.9461	23.6897	22.9589	25.3467	22.8351	22.2882	22.0736	24.0525	21.7695	20.7155	20.5169	22.6819	20.1942
2015-08-18	25.3099	25.2795	26.2406	24.6154	25.3606	24.5987	26.334	24.5112	23.9017	23.1296	25.6853	22.998	22.3632	22.1001	24.3348	21.8178	20.7227	20.5055	22.7584	20.1727
2015-08-19	24.8996	25.1107	25.9888	24.4514	24.9085	24.4688	25.5564	24.1602	23.9145	23.2217	25.0505	22.8652	22.453	22.1618	24.2335	21.8491	20.7468	20.5105	22.8462	20.1683
2015-08-20	24.7325	25.1364	26.6873	24.3966	24.7427	24.5022	25.8559	24.0278	23.8379	23.243	25.0544	22.7521	22.4798	22.1959	24.1333	21.8159	20.7854	20.528	22.8467	20.17
2015-08-21	24.7279	25.104	26.1264	24.0764	24.7729	24.5466	25.9791	23.882	23.8041	23.2755	25.3494	22.6799	22.4797	22.2202	24.2307	21.768	20.8132	20.55	22.8519	20.1645
2015-08-22	24.8799	25.1246	26.6497	24.3123	24.7573	24.4739	25.7813	23.9003	23.7648	23.2727	25.0416	22.5673	22.4817	22.2444	24.155	21.7237	20.8344	20.5739	22.8668	20.1513
2015-08-23	24.6227	25.0519	25.8976	23.6001	24.7777	24.5398	25.8929	23.5891	23.7731	23.2896	25.3065	22.5504	22.477	22.2523	24.2234	21.6811	20.8632	20.597	22.8729	20.1344
2015-08-24	23.8858	24.652	25.7922	23.7169	24.1074	24.2211	25.1539	23.3734	23.6987	23.2654	24.7088	22.3563	22.4855	22.2685	24.0825	21.637	20.8821	20.6184	22.9095	20.1214
2015-08-25	21.7387	23.3661	24.1876	22.509	22.7085	23.557	24.4627	22.7155	23.4808	23.153	24.4546	22.2144	22.4533	22.2493	23.9234	21.5565	20.898	20.6404	22.886	20.1027
2015-08-26	22.1389	22.7175	24.2542	22.505	22.4703	22.8706	24.0813	22.4996	23.095	22.8517	23.9099	21.9425	22.3541	22.1719	23.5844	21.4579	20.9068	20.649	22.8073	20.0743
2015-08-27	23.136	22.8256	25.0217	22.9149	23.0852	22.6657	24.3291	22.6337	22.885	22.5396	23.8022	21.764	22.2163	22.0259	23.3547	21.3369	20.8935	20.6391	22.6794	20.035
2015-08-28	24.1256	23.8012	26.0371	23.5118	24.0046	23.2067	25.266	23.2126	22.9353	22.4084	24.3239	21.7933	22.1169	21.8815	23.4181	21.2406	20.8665	20.6043	22.5706	19.9852
2015-08-29	24.17	24.0426	26.2661	23.5878	24.0491	23.4408	25.453	23.1777	23.0793	22.4742	24.563	21.8398	22.0942	21.8139	23.6049	21.2119	20.8338	20.562	22.5614	19.9393
2015-08-30	23.7235	24.1336	25.7832	23.3034	23.9637	23.6312	25.5155	23.2002	23.1689	22.5586	24.7973	21.8949	22.1107	21.8017	23.7513	21.1978	20.8174	20.5259	22.5941	19.9038
2015-08-31	22.5952	23.4958	25.0223	22.0541	23.0605	23.2812	24.6608	22.2033	23.1357	22.5863	24.3325	21.7855	22.1307	21.8167	23.6882	21.1938	20.8109	20.5048	22.6236	19.884
2015-09-01	23.0777	23.5062	25.9623	22.2668	23.2353	23.174	25.1813	22.1179	22.9782	22.4899	24.3812	21.5156	22.108	21.792	23.5726	21.1171	20.8114	20.4913	22.5954	19.8636
2015-09-02	23.5905	23.7977	26.3369	22.8214	23.5814	23.2985	25.5679	22.4256	22.9592	22.4267	24.6584	21.3881	22.0688	21.7473	23.6624	21.0122	20.8104	20.4777	22.5742	19.833
2015-09-03	23.7003	23.9415	25.3536	22.9409	23.8464	23.4793	25.4289	22.71	23.048	22.4569	24.8631	21.4306	22.057	21.7184	23.8042	20.9457	20.8037	20.4628	22.6001	19.79
2015-09-04	21.3378	22.6783	22.5253	21.4105	22.2809	22.8473	23.438	21.724	23.0238	22.4757	23.9462	21.3822	22.0855	21.7261	23.6485	20.9285	20.8049	20.4525	22.6491	19.7538
2015-09-05	21.0349	22.1054	22.6538	21.165	21.6024	22.2298	22.8078	21.2941	22.6285	22.2278	23.0286	21.0767	22.0343	21.6791	23.0919	20.8601	20.8079	20.4425	22.5759	19.7246
2015-09-06	20.6105	21.4836	22.6806	20.5604	21.0855	21.7398	22.5551	20.6677	22.2912	21.9433	22.6656	20.8084	21.8972	21.5568	22.7203	20.715	20.7973	20.4256	22.4052	19.687
2015-09-07	22.3719	21.6538	22.9809	20.8214	22.1756	21.6486	22.9407	20.7902	22.0915	21.6735	22.7898	20.5956	21.7458	21.3978	22.5513	20.5514	20.7632	20.3911	22.233	19.621
2015-09-08	21.4784	21.6415	21.669	20.5681	21.9646	21.6758	22.3473	20.768	22.133	21.5423	22.6841	20.5437	21.6353	21.2534	22.4953	20.4157	20.7163	20.3424	22.1118	19.5495
2015-09-09	19.8593	20.6001	19.864	19.2324	20.5958	21.0426	20.8402	19.7292	21.9419	21.4293	21.7889	20.3552	21.5639	21.1524	22.1617	20.3189	20.6662	20.2853	22.0111	19.4787
2015-09-10	18.7694	19.7598	18.8325	18.3785	19.5165	20.3259	19.7031	18.8707	21.4918	21.1669	20.8673	19.9449	21.4176	21.0134	21.6085	20.1597	20.6191	20.2249	21.835	19.4109
2015-09-11	17.7506	18.9031	17.9725	17.2817	18.4449	19.5447	18.666	17.8577	20.8802	20.7532	19.7424	19.381	21.1802	20.8133	20.9278	19.9482	20.5504	20.1561	21.565	19.3264
2015-09-12	16.9327	18.0516	17.6548	15.8629	17.5287	18.8662	18.0311	16.6351	20.2219	20.2754	18.9849	18.7365	20.8685	20.5551	20.2479	19.6316	20.458	20.0677	21.2122	19.2118
2015-09-13	17.0668	17.5681	18.0224	16.0097	17.4717	18.3457	18.2664	16.3813	19.6735	19.7903	18.8687	18.0828	20.5173	20.257	19.7771	19.2514	20.3303	19.9539	20.8335	19.0639
2015-09-14	18.4204	17.7448	19.322	17.0152	18.2434	18.1687	18.8039	17.0195	19.3576	19.3834	18.8834	17.7502	20.1831	19.9512	19.5124	18.8913	20.1744	19.816	20.4976	18.8848
2015-09-15	19.7051	18.2848	20.5792	17.9181	19.3338	18.3934	19.857	17.7421	19.3695	19.1444	19.4902	17.9004	19.9253	19.6828	19.5636	18.6403	20.0087	19.6675	20.2489	18.6969
2015-09-16	20.0759	18.9022	20.5519	18.3007	19.9491	18.8053	20.4122	18.2073	19.5988	19.0953	20.1101	18.093	19.7994	19.4943	19.8328	18.5143	19.8556	19.5142	20.1235	18.526
2015-09-17	20.3873	19.3349	20.6122	18.9737	20.2069	19.1272	20.3298	18.6865	19.81	19.1681	20.1604	18.2431	19.7728	19.394	19.9892	18.4781	19.7322	19.3761	20.1014	18.3916
2015-09-18	20.7625	19.7735	21.3208	19.424	20.5162	19.473	20.6964	19.1785	19.9606	19.2801	20.3355	18.4724	19.7804	19.3555	20.0837	18.4829	19.6385	19.2643	20.0938	18.6054
2015-09-19	20.3871	19.6128	21.403	18.9485	20.3053	19.5016	20.9457	18.8806	20.0638	19.397	20.602	18.6093	19.8011	19.3578	20.2457	18.5287	19.5692	19.1749	20.1074	18.2243
2015-09-20	21.0121	19.8956	22.0715	19.4937	20.6819	19.642	21.3242	19.217	20.1058	19.4378	20.8053	18.6405	19.8178	19.3637	20.3658	18.5541	19.5158	19.1088	20.1351	18.1766
2015-09-21	21.1799	20.2286	22.4034	19.541	20.9626	19.9145	21.8075	19.3833	20.2357	19.5164	21.2073	18.7868	19.8297	19.3676	20.564	18.5799	19.4772	19.0585	20.1769	18.1445
2015-09-22	20.0156	19.9805	21.2391	18.6243	20.4403	19.9399	21.4499	18.9441	20.3632	19.6315	21.2812	18.8597	19.8673	19.3959	20.7431	18.6234	19.446	19.0247	20.246	18.1181
2015-09-23	17.3039	18.5199	18.0358	16.5899	18.4183	19.1439	19.3578	17.2797	20.175	19.617	20.3585	18.5373	19.894	19.421	20.5577	18.6248	19.4291	19.0022	20.3056	18.1004
2015-09-24	18.284	18.1156	19.0299	16.9305	18.2855	18.5136	18.7501	17.0599	19.6147	19.2962	19.2009	17.9619	19.804	19.357	19.8895	18.4803	19.4127	18.9757	20.2053	18.0721
2015-09-25	18.0602	17.9748	18.6494	16.121	18.3898	18.3874	18.9957	16.6783	19.3425	19.0188	19.3193	17.7361	19.6163	19.2113	19.6118	18.2705	19.3753	18.9402	19.9934	18.0108
2015-09-26	18.5127	17.6162	19.6791	16.2004	18.3728	17.9979	19	16.3035	19.1547	18.7961	19.0204	17.3643	19.4548	19.0613	19.3851	18.0859	19.3084	18.877	19.8202	17.9223
2015-09-27	20.4635	18.7609	21.669	17.989	19.9158	18.4948	20.7387	17.6283	19.1632	18.6185	19.8986	17.3296	19.3208	18.9023	19.4813	17.8865	19.2322	18.8007	19.6813	17.8233
2015-09-28	18.2376	18.672	18.8062	16.9849	19.0698	18.7714	19.8996	17.3719	19.4535	18.7247	20.2517	17.5852	19.2838	18.8136	19.8604	17.8111	19.1514	18.7252	19.6796	17.7195
2015-09-29	16.1776	17.4268	16.6969	15.7502	17.2732	18.0472	17.8551	16.3218	19.2615	18.712	19.0015	17.3767	19.2894	18.7874	19.5714	17.7857	19.0926	18.6509	19.706	17.6392
2015-09-30	14.6054	16.2084	14.81	14.2942	15.8409	17.1431	16.2897	15.1711	18.6838	18.4251	17.8353	16.922	19.1774	18.7089	18.9409	17.6608	19.0466	18.5983	19.5847	17.5703
2015-10-01	12.6856	14.3949	13.2805	11.486	13.8813	15.868	14.4011	12.8009	17.9226	17.9534	16.3265	16.164	18.9254	18.5252	18.1114	17.4248	18.9806	18.5317	19.314	17.4854
2015-10-02	13.2603	14.0768	15.0675	12.0224	13.859	15.2105	15.0806	12.6185	17.1209	17.3224	15.9757	15.2987	18.5555	18.228	17.3834	17.0317	18.882	18.4384	18.9209	17.3613
2015-10-03	13.8112	14.1929	14.9481	12.5691	14.5098	15.086	15.5447	13.0402	16.7514	16.8611	16.2943	14.9184	18.1661	17.8828	17.178	16.6068	18.7387	18.314	18.5606	17.1885
2015-10-04	15.2084	14.4783	16.7224	13.5064	15.1327	15.0102	15.9333	13.5873	16.5924	16.5534	16.1348	14.7422	17.8723	17.5795	16.9944	16.2926	18.5644	18.1572	18.2942	16.9874
2015-10-05	16.6535	15.5	18.8551	14.4922	16.3695	15.5691	17.7896	14.3857	16.6581	16.4126	17.1593	14.8399	17.662	17.3338	17.1769	16.0788	18.3963	17.9957	18.0993	16.7962
2015-10-06	15.9418	15.9466	17.2753	14.2491	16.513	16.1012	17.9718	14.5633	16.9625	16.5084	18.0086	15.078	17.569	17.1932	17.6699	15.9806	18.2419	17.8399	18.0569	16.6255
2015-10-07	15.4196	15.3198	16.7491	14.2591	15.7251	15.7416	16.653	14.3506	16.9972	16.5895	17.1449	15.0093	17.567	17.1392	17.6352	15.9469	18.1146	17.7055	18.1096	16.4908
2015-10-08	13.6711	14.373	15.386	11.848	14.7972	15.2808	16.1917	13.0594	16.8359	16.4823	16.956	14.9299	17.5144	17.0744	17.456	15.8759	18.0195	17.5983	18.0681	16.3844
2015-10-09	12.7557	13.1375	14.9186	10.2483	13.6023	14.3215	15.2975	11.3098	16.4488	16.1768	16.2179	14.2962	17.3997	16.9577	17.1174	15.7383	17.9332	17.4984	17.9639	16.2827
2015-10-10	13.0469	13.2748	15.3148	10.381	13.7997	14.1433	15.6486	11.2547	16.0454	15.7697	16.1666	13.5571	17.193	16.7489	16.828	15.4438	17.8407	17.3952	17.8002	16.1677
2015-10-11	12.2603	12.585	14.5643	9.34532	13.086	13.6678	15.022	10.3224	15.7734	15.4865	15.8487	13.0742	16.9819	16.5217	16.6636	15.1338	17.7265	17.2773	17.6435	16.0178
2015-10-12	13.0402	12.6243	15.8116	9.83478	13.3834	13.4542	15.5194	10.4045	15.4661	15.174	15.7949	12.5921	16.7716	16.2944	16.4607	14.8129	17.6046	17.1426	17.4865	15.8488
2015-10-13	12.2972	12.604	14.2435	9.89884	13.3237	13.4635	15.4197	10.5533	15.37	14.975	16.1142	12.388	16.5755	16.082	16.5126	14.5111	17.472	17.0049	17.3629	15.6628
2015-10-14	11.7474	12.0887	13.1854	10.3976	12.4913	13.0127	13.8457	10.6754	15.1589	14.7972	15.0955	12.2184	16.4294	15.901	16.2315	14.2369	17.3436	16.8633	17.2611	15.4744
2015-10-15	12.9481	12.2217	15.0424	11.3174	13.0219	12.9058	14.5068	11.3398	14.8552	14.5627	14.8975	12.1911	16.2365	15.7111	15.8419	14.0635	17.2079	16.724	17.0726	15.2965
2015-10-16	14.3452	13.0202	17.055	12.1452	14.1487	13.2857	16.1411	12.0329	14.8501	14.4263	15.7247	12.3407	16.0407	15.5277	15.9144	13.9478	17.0706	16.5808	16.8948	15.1297
2015-10-17	15.9205	14.5097	18.0793	13.6696	15.5806	14.2282	17.4846	13.3267	15.1315	14.5108	16.7444	12.654	15.951	15.4096	16.333	13.8941	16.9417	16.4455	16.8368	14.9854
2015-10-18	15.8983	14.8073	18.1229	13.7056	15.7207	14.6843	17.5107	13.5385	15.5248	14.7905	17.0538	13.0408	15.9785	15.3967	16.7187	13.9632	16.8321	16.3259	16.9048	14.8789
2015-10-19	16.4399	15.1888	18.6594	14.1026	16.1706	15.0165	17.9586	13.8551	15.785	15.0257	17.4047	13.299	16.0665	15.4572	16.968	14.1049	16.7556	16.2314	17.005	14.8135
2015-10-20	16.8526	15.649	19.1172	14.5709	16.6051	15.384	18.4392	14.3153	16.0434	15.2379	17.8027	13.5525	16.1655	15.5377	17.2388	14.2205	16.704	16.1695	17.1183	14.7794
2015-10-21	16.8614	15.9443	18.9234	14.6985	16.7619	15.696	18.5827	14.4954	16.2966	15.4558	18.0943	13.7906	16.2766	15.6351	17.5067	14.3414	16.6838	16.1335	17.2515	14.7649
2015-10-22	14.2806	15.1513	15.2962	12.6595	15.4638	15.5471	16.9458	13.4558	16.4511	15.6589	17.75	13.9492	16.3946	15.7502	17.6255	14.413	16.6801	16.1238	17.3971	14.7691
2015-10-23	12.9915	13.8001	13.5524	11.919	13.8965	14.5599	14.7228	12.4319	16.1182	15.5868	16.1342	13.6263	16.449	15.8205	17.0711	14.5041	16.6803	16.1198	17.4319	14.7816
2015-10-24	11.866	12.7601	12.2876	10.9444	12.8428	13.7581	13.5268	11.5664	15.6035	15.2759	15.1197	13.2615	16.3415	15.7699	16.3914	14.3998	16.6799	16.1182	17.2801	14.7769
2015-10-25	11.317	12.4127	11.5755	10.622	12.3221	13.3374	12.923	11.2791	15.1069	14.9137	14.4645	12.943	16.1317	15.6246	15.8008	14.2256	16.6423	16.0929	17.0206	14.7355
2015-10-26	9.46814	11.1257	9.80769	8.71007	10.9229	12.5065	11.4799	9.93321	14.6104	14.56	13.487	12.5611	15.8893	15.4413	15.2172	14.0387	16.58	16.0421	16.7331	14.6694
2015-10-27	8.05668	9.12223	8.83732	6.2391	9.17135	10.9964	9.82585	7.57147	13.8546	14.0252	12.1402	11.736	15.5927	15.2077	14.4298	13.7623	16.4818	15.9603	16.3897	14.5719
2015-10-28	9.06568	9.08248	9.95077	6.56376	9.71354	10.4668	10.4886	7.44481	13.1374	13.3495	11.8794	10.8431	15.1901	14.8629	13.7549	13.3263	16.3452	15.8476	15.9603	14.4377
2015-10-29	8.45999	8.69798	9.27448	5.81487	9.53475	10.1481	10.3234	6.99126	12.8029	12.8667	11.7856	10.319	14.808	14.4894	13.4575	12.8874	16.1774	15.706	15.5783	14.2533
2015-10-30	7.72003	7.64697	8.15591	4.62744	8.7139	9.33687	9.33875	5.84662	12.4562	12.4353	11.1846	9.74935	14.4992	14.1561	13.1067	12.4584	15.9933	15.5356	15.2643	14.0411
2015-10-31	6.87468	7.2929	6.91845	4.75634	8.26904	8.87466	8.71349	5.68515	12.0694	11.9475	10.759	9.15119	14.1948	13.8155	12.7142	12.0724	15.8042	15.3529	14.9519	13.8119
